# Supplementary material for: Reactions of trialkoxynitridomolybdenum with low-coordinate phosphorus compounds containing a PN double bond
Source: Royal Society of Chemistry journal article supplement (doi:10.1039/c0dt00694g), 2010-12-03
Supplement: c0dt00694g.pdf [file c0dt00694g.pdf]

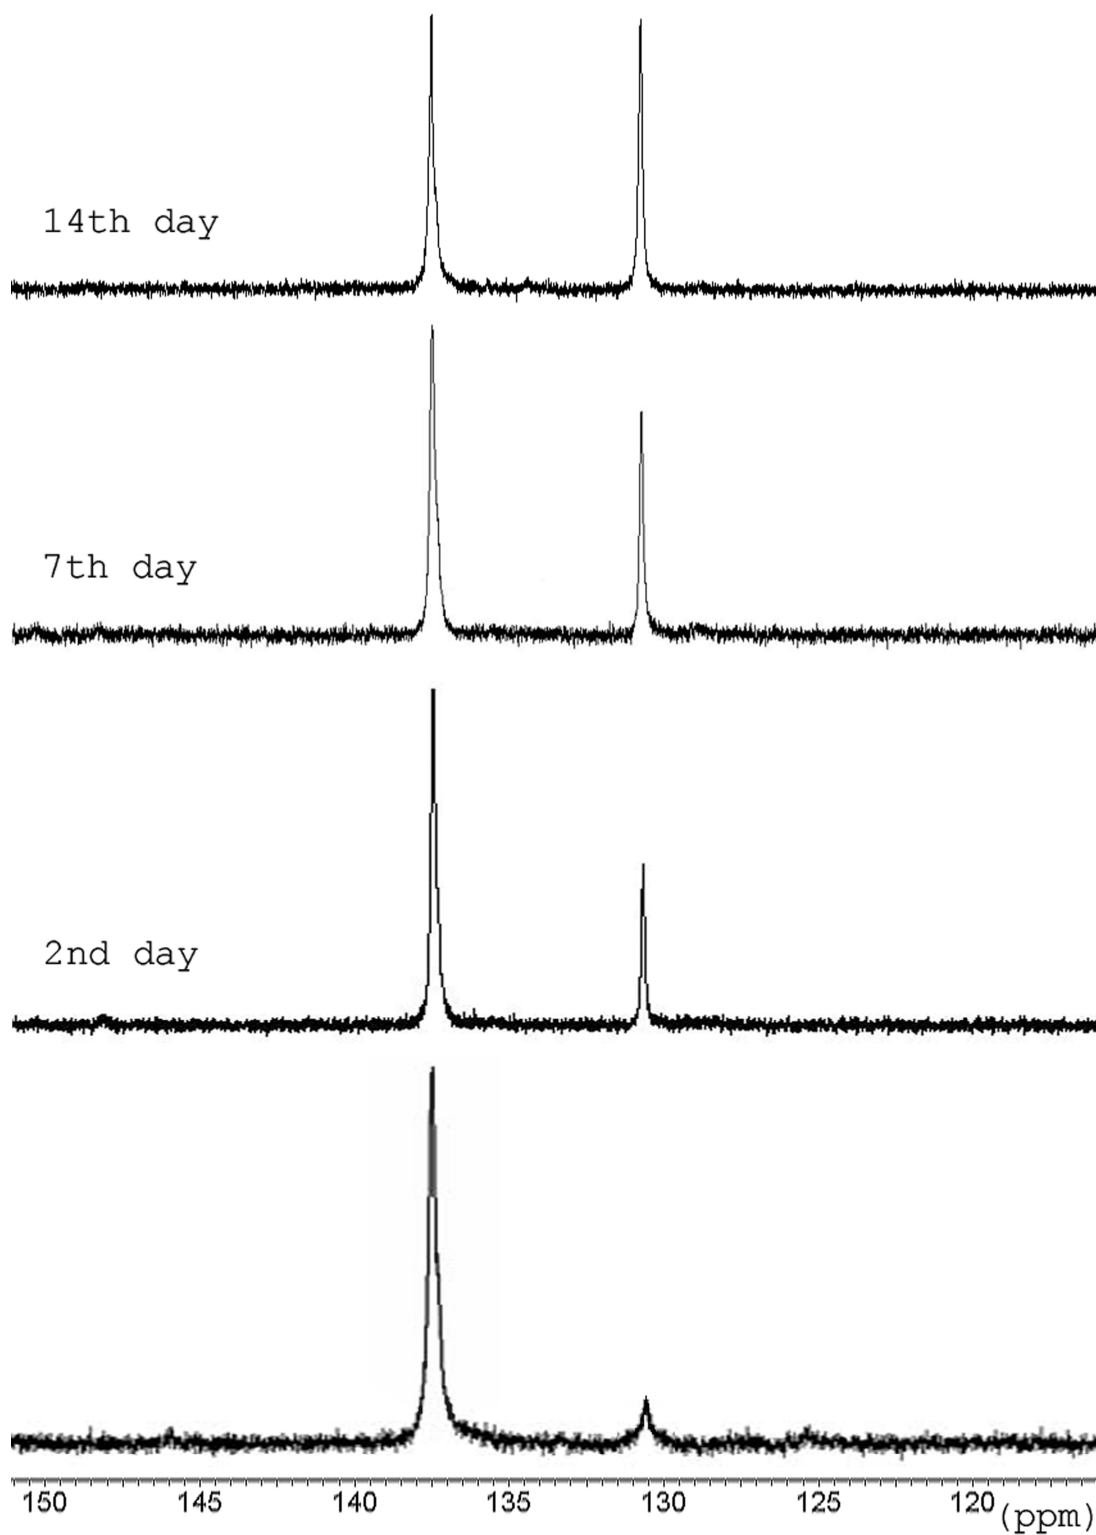

**Fig. S1.** Dependence of the  $^{31}\text{P}$  NMR spectra in **(10)** as a function of time.

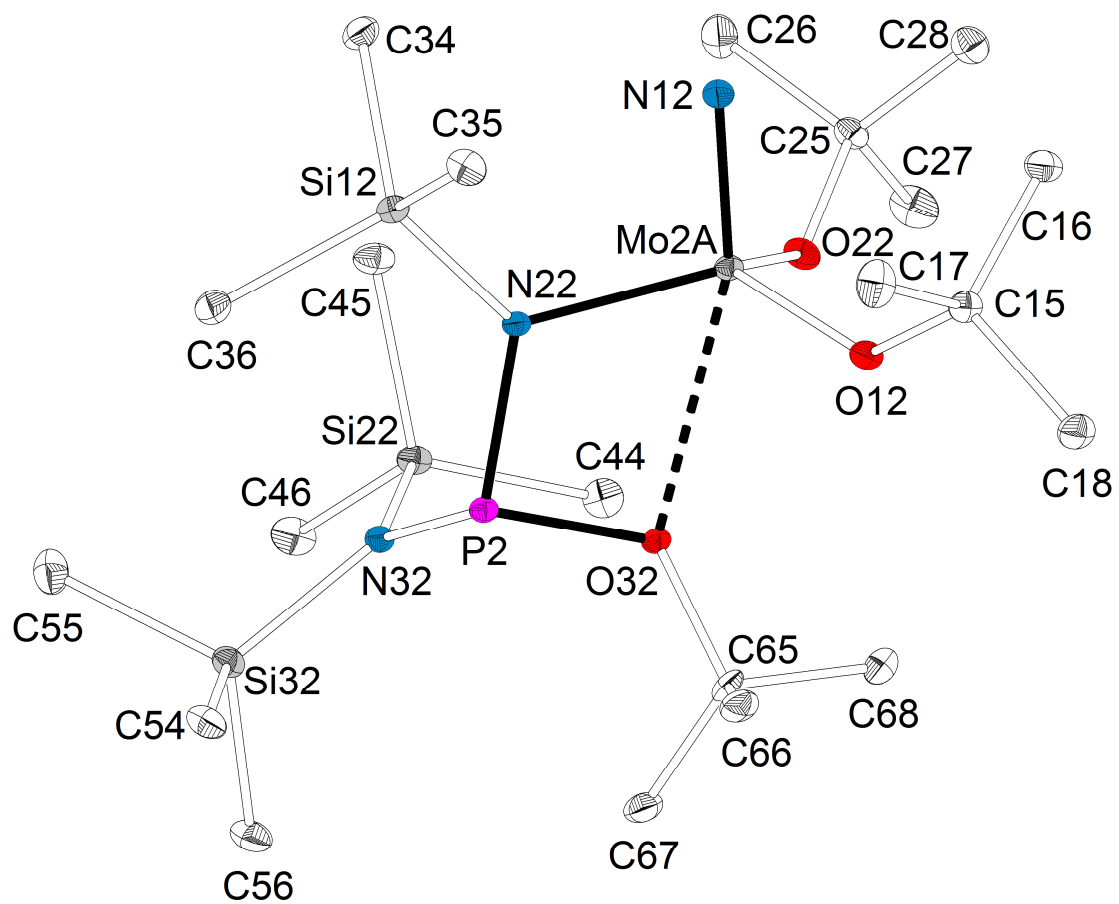

**Fig. S2.** The structure of **5b**.

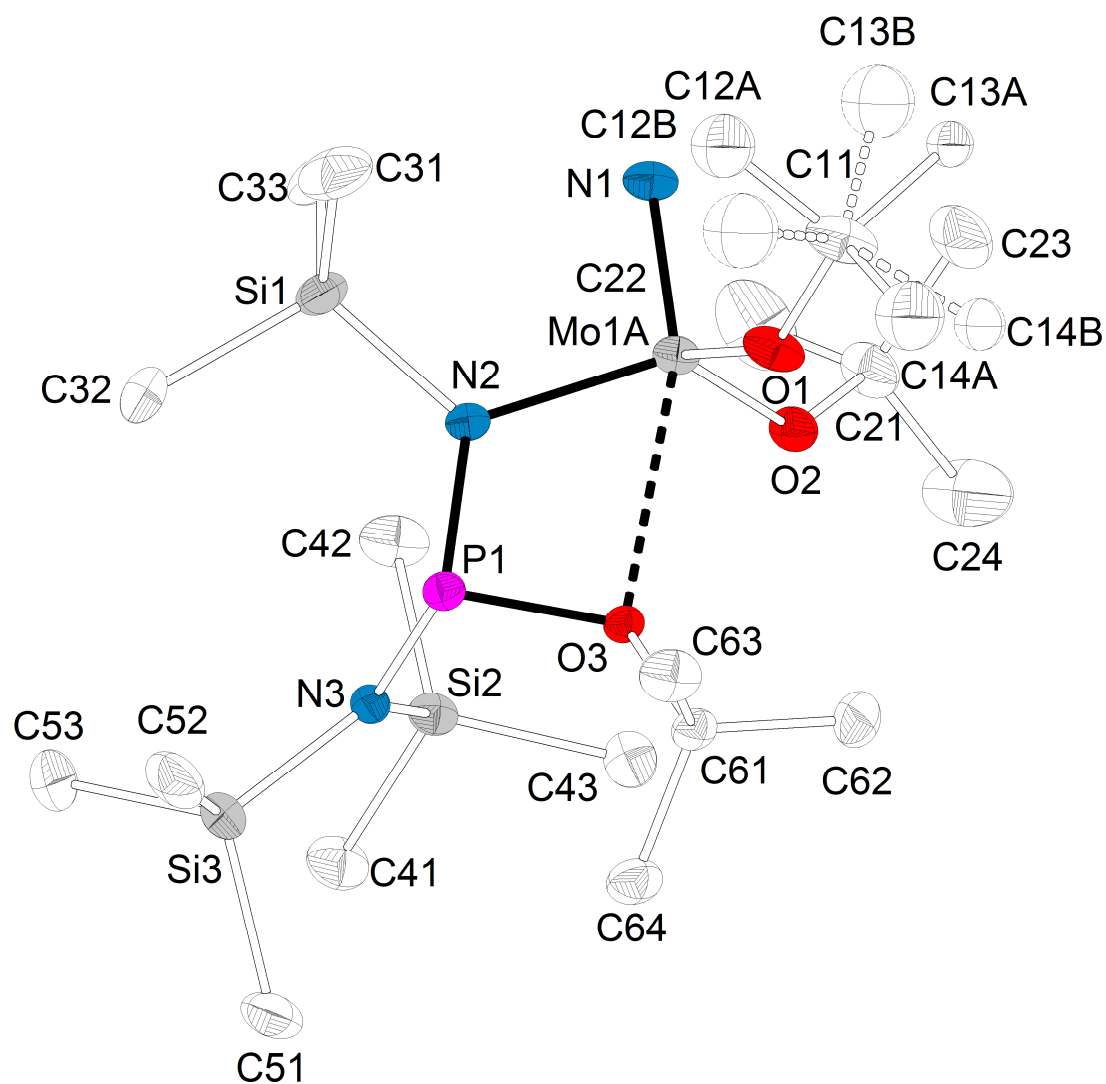

**Fig. S3.** The structure of **5c**. The disordered part of the *tert*-butoxy groups is shown with the dashed open lines.
